# Supplementary material for: Fast and accurate quantitative organic acid analysis with LC-QTOF/MS facilitates screening of patients for inborn errors of metabolism
Source: J Inherit Metab Dis. 2018 Feb 12;41(3):415–24. doi: 10.1007/s10545-017-0129-0 (PMC5959959; doi:10.1007/s10545-017-0129-0)
Supplement: Supplementary file 1 — (XLSX 13.7 kb) [file 10545_2017_129_MOESM1_ESM.xlsx]

## Sheet: table s1
Table s1. Standards and ISTDs
	Name	Type	Vendor	Standard stereo isoform	Covered stereo isoform (as in HMDB)	HMDB
standards
1	Acetoacetic acid	Target	Sigma-Aldrich (Zwijndrecht, The Netherlands)			HMDB00060
2	N-Acetylglutamine	Target	Sigma-Aldrich (Zwijndrecht, The Netherlands)	L-	L-	HMDB06029
3	N-Acetyl-L-alanine	Target	Sigma-Aldrich (Zwijndrecht, The Netherlands)	L-	L-	HMDB00766
4	N-Acetyl-L-aspartic acid	Target	Sigma-Aldrich (Zwijndrecht, The Netherlands)	DL-	L-	HMDB00812
5	N-Acetyl-L-methionine	Target	Sigma-Aldrich (Zwijndrecht, The Netherlands)	L-	L-	HMDB11745
6	Adipic acid	Target	Sigma-Aldrich (Zwijndrecht, The Netherlands)			HMDB00448
7	Argininosuccinic acid	Target	Sigma-Aldrich (Zwijndrecht, The Netherlands)			HMDB00052
8	N-Butyrylglycine	Target	VU Organic Synthesis Laboratory (Amsterdam, The Netherlands)			HMDB00808
9	Citric acid	Target	Merck (Amsterdam, The Netherlands)			HMDB00094
10	Ethylmalonic acid	Target	Sigma-Aldrich (Zwijndrecht, The Netherlands)			HMDB00622
11	Fumaric acid	Target	Sigma-Aldrich (Zwijndrecht, The Netherlands)			HMDB00134
12	Glutaric acid	Target	Sigma-Aldrich (Zwijndrecht, The Netherlands)			HMDB00661
13	Glyceric acid	Target	Sigma-Aldrich (Zwijndrecht, The Netherlands)	DL-	D, L-	HMDB00139/HMDB06372
14	Glycolic acid	Target	Sigma-Aldrich (Zwijndrecht, The Netherlands)			HMDB00115
15	Hawkinsin *	Target	—			HMDB02354
16	Hexanoylglycine	Target	VU Organic Synthesis Laboratory (Amsterdam, The Netherlands)			HMDB00701
17	Homogentisic acid	Target	Sigma-Aldrich (Zwijndrecht, The Netherlands)			HMDB00130
18	Homovanillic acid	Target	Sigma-Aldrich (Zwijndrecht, The Netherlands)			HMDB00118
19	Hydantoin-5-propionic acid	Target	Matrix Scientific (Columbia, SC, USA)			HMDB01212
20	2-Hydroxy-3-methylbutyric acid	Target	Sigma-Aldrich (Zwijndrecht, The Netherlands)	DL-	no specific	HMDB00407
21	3-Hydroxy-3-methylglutaric acid	Target	Sigma-Aldrich (Zwijndrecht, The Netherlands)			HMDB00355
22	2-Hydroxy-3-methylpentanoic acid	Target	Sigma-Aldrich (Zwijndrecht, The Netherlands)	L-	no specific	HMDB00317
23	2-Hydroxyadipic acid	Target	TRC (Toronto, Canada)			HMDB00321
24	3-Hydroxybutyric acid	Target	Sigma-Aldrich (Zwijndrecht, The Netherlands)			HMDB00357
25	4-Hydroxybutyric acid	Target	Sigma-Aldrich (Zwijndrecht, The Netherlands)			HMDB00710
26	3-Hydroxyglutaric acid	Target	VU Organic Synthesis Laboratory (Amsterdam, The Netherlands)			HMDB00428
27	2-Hydroxyglutaric acid	Target	Sigma-Aldrich (Zwijndrecht, The Netherlands)	D-	D, L-	HMDB00606/HMDB00694
28	5-Hydroxyindoleacetic acid	Target	Sigma-Aldrich (Zwijndrecht, The Netherlands)			HMDB00763
29	3-Hydroxyisobutyric acid	Target	Sigma-Aldrich (Zwijndrecht, The Netherlands)	D-/R-	D-/R-, L-/S-	HMDB00336/HMDB00023
30	2-Hydroxyisocaproic acid	Target	Sigma-Aldrich (Zwijndrecht, The Netherlands)	L-	L-	HMDB00746
31	3-Hydroxyisovaleric acid	Target	VU Organic Synthesis Laboratory (Amsterdam, The Netherlands)			HMDB00754
32	Ortho-Hydroxyphenylacetic acid	Target	Janssen Pharmaceuticals (Berrse, Belgium)			HMDB00669
33	4-Hydroxyphenylacetic acid	Target	Sigma-Aldrich (Zwijndrecht, The Netherlands)			HMDB00020
34	4-Hydroxyphenyllactic acid	Target	Sigma-Aldrich (Zwijndrecht, The Netherlands)	DL-	no specific	HMDB00755
35	4-Hydroxyphenylpyruvic acid	Target	Sigma-Aldrich (Zwijndrecht, The Netherlands)			HMDB00707
36	3-Hydroxypropionic acid	Target	Chem Service, Inc. (West Chester,PA, USA)			HMBD00700
37	3-Hydroxysebacic acid *	Target	—			HMDB00350
38	Isobutyrylglycine	Target	VU Organic Synthesis Laboratory (Amsterdam, The Netherlands)			HMDB00730
39	Isovalerylglycine	Target	VU Organic Synthesis Laboratory (Amsterdam, The Netherlands)			HMDB00678
40	Alpha-ketoisovaleric acid	Target	Sigma-Aldrich (Zwijndrecht, The Netherlands)			HMDB00019
41	Lactic acid	Target	Sigma-Aldrich (Zwijndrecht, The Netherlands)	L-	L-	HMDB00190
42	Malic acid	Target	Sigma-Aldrich (Zwijndrecht, The Netherlands)	L-	no specific	HMDB00744
43	Malonic acid	Target	Sigma-Aldrich (Zwijndrecht, The Netherlands)			HMDB00691
44	3-Methyl-2-oxovaleric acid	Target	Sigma-Aldrich (Zwijndrecht, The Netherlands)	DL-	no specific	HMDB00491
45	2-Methyl-3-hydroxybutyric acid	Target	TRC (Toronto, Canada)			HMDB00354
46	3-Methyladipic acid	Target	Sigma-Aldrich (Zwijndrecht, The Netherlands)			HMDB00555
47	2-Methylbutyrylglycine	Target	VU Organic Synthesis Laboratory (Amsterdam, The Netherlands)			HMDB00339
48	2-Methylcitric acid	Target	C/D/N Isotopes (Quebec, Canada)			HMDB00379
49	3-Methylcrotonylglycine	Target	VU Organic Synthesis Laboratory (Amsterdam, The Netherlands)			HMDB00459
50	3-Methylglutaconic acid	Target	Synchem UG & Co. KG (Altenburg, Germany)			HMDB00522
51	3-Methylglutaric acid	Target	Sigma-Aldrich (Zwijndrecht, The Netherlands)			HMDB00752
52	Methylmalonic acid	Target	Sigma-Aldrich (Zwijndrecht, The Netherlands)			HMDB00202
53	Methylsuccinic acid	Target	Sigma-Aldrich (Zwijndrecht, The Netherlands)			HMDB01844
54	Mevalonic acid	Target	Sigma-Aldrich (Zwijndrecht, The Netherlands)	DL- (lactone)	no specific	HMDB00227
55	Orotic acid	Target	Sigma-Aldrich (Zwijndrecht, The Netherlands)			HMDB00226
56	Oxoadipic acid	Target	Sigma-Aldrich (Zwijndrecht, The Netherlands)			HMDB00225
57	Oxoglutaric acid	Target	Sigma-Aldrich (Zwijndrecht, The Netherlands)			HMDB00208
58	3-Phenyllactic acid	Target	Sigma-Aldrich (Zwijndrecht, The Netherlands)	DL-	no specific	HMDB00748
59	Phenylpropionylglycine	Target	VU Organic Synthesis Laboratory (Amsterdam, The Netherlands)			HMDB00860
60	Propionylglycine	Target	VU Organic Synthesis Laboratory (Amsterdam, The Netherlands)			HMDB00783
61	Pyroglutamic acid	Target	Sigma-Aldrich (Zwijndrecht, The Netherlands)	L-	L-	HMDB00267
62	2-Pyrroloylglycine *	Target	—			HMDB59778
63	Pyruvic acid	Target	Sigma-Aldrich (Zwijndrecht, The Netherlands)			HMDB00243
64	Sebacic acid	Target	Sigma-Aldrich (Zwijndrecht, The Netherlands)			HMDB00792
65	Suberic acid	Target	Sigma-Aldrich (Zwijndrecht, The Netherlands)			HMDB00893
66	Suberylglycine	Target	VU Organic Synthesis Laboratory (Amsterdam, The Netherlands)			HMDB00953
67	Succinic acid	Target	Sigma-Aldrich (Zwijndrecht, The Netherlands)			HMDB00254
68	Succinylacetone	Target	Sigma-Aldrich (Zwijndrecht, The Netherlands)			HMDB00635
69	Tiglylglycine	Target	VU Organic Synthesis Laboratory (Amsterdam, The Netherlands)			HMDB00959
70	Vanillactic acid	Target	Sigma-Aldrich (Zwijndrecht, The Netherlands)			HMDB00913
71	Vanillylmandelic acid	Target	Sigma-Aldrich (Zwijndrecht, The Netherlands)	DL-	DL-	HMDB00291
Internal standards
1	D3-glyceric acid	ISTD	Isotec Sigma-Aldrich (Miamisburg, OH, USA)	DL-
2	D2-glycolic acid	ISTD	Cambridge Isotope Laboratories (Tewksbury, MA, USA)
3	13C3-pyruvic acid	ISTD	Isotec Sigma-Aldrich (Miamisburg, OH, USA)
4	D3-malic acid	ISTD	C/D/N Isotopes (Quebec, Canada)
5	13C3-lactic acid	ISTD	Isotec Sigma-Aldrich (Miamisburg, OH, USA)	L-
6	13C5-oxoglutaric acid	ISTD	Cambridge Isotope Laboratories (Tewksbury, MA, USA)
7	D5-pyroglutamic acid	ISTD	C/D/N Isotopes (Quebec, Canada)
8	D4-citric acid	ISTD	Cambridge Isotope Laboratories (Tewksbury, MA, USA)
9	D3-propionylglycine	ISTD	VU Organic Synthesis Laboratory (Amsterdam, The Netherlands)
10	13C4-3-hydroxybutyric acid	ISTD	Isotec Sigma-Aldrich (Miamisburg, OH, USA)	DL-
11	D3-methylmalonic acid	ISTD	Cambridge Isotope Laboratories (Tewksbury, MA, USA)
12	D3-3-hydroxy-3-methyl-glutaric acid	ISTD	C/D/N Isotopes (Quebec, Canada)
13	D3-methyl citric acid	ISTD	C/D/N Isotopes (Quebec, Canada)
14	D4-glutaric acid	ISTD	Cambridge Isotope Laboratories (Tewksbury, MA, USA)
15	13C5-Succinyl aceton	ISTD	Cambridge Isotope Laboratories (Tewksbury, MA, USA)
16	D5-ethylmalonic acid	ISTD	C/D/N Isotopes (Quebec, Canada)
17	D4-adipic acid	ISTD	C/D/N Isotopes (Quebec, Canada)
18	D3-hexanoylglycine	ISTD	VU Organic Synthesis Laboratory (Amsterdam, The Netherlands)
19	D4-sebacic acid	ISTD	C/D/N Isotopes (Quebec, Canada)
