# Supplementary material for: Fast and accurate quantitative organic acid analysis with LC-QTOF/MS facilitates screening of patients for inborn errors of metabolism
Source: J Inherit Metab Dis. 2018 Feb 12;41(3):415–24. doi: 10.1007/s10545-017-0129-0 (PMC5959959; doi:10.1007/s10545-017-0129-0)
Supplement: Supplementary file 5 — (PDF 602 kb) [file 10545_2017_129_MOESM5_ESM.pdf]

**Supplemental Figure: Typical chromatograms of peaks with poor peak shape or from isomers.**

**A. The separation of isomers 2-Hydroxyglutaric acid and 3-Hydroxyglutaric acid**

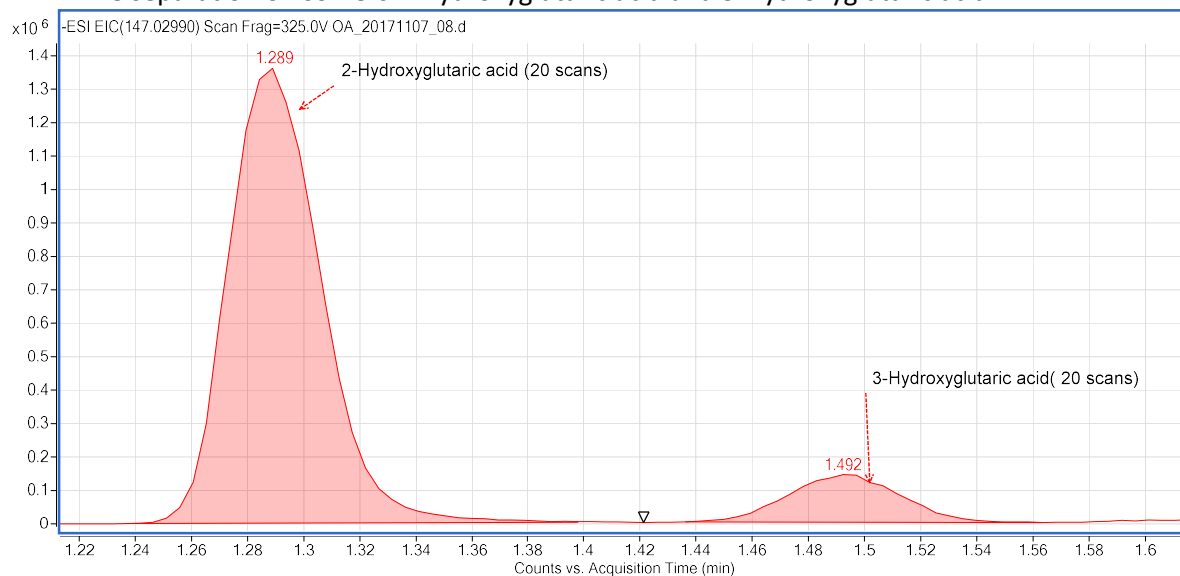

Standard 2-Hydroxyglutaric acid concentration is 153  $\mu\text{M}$ ; Standard 3-Hydroxyglutaric acid 58  $\mu\text{M}$

**B: The multiple-peaks of 2-methylcitric acid**

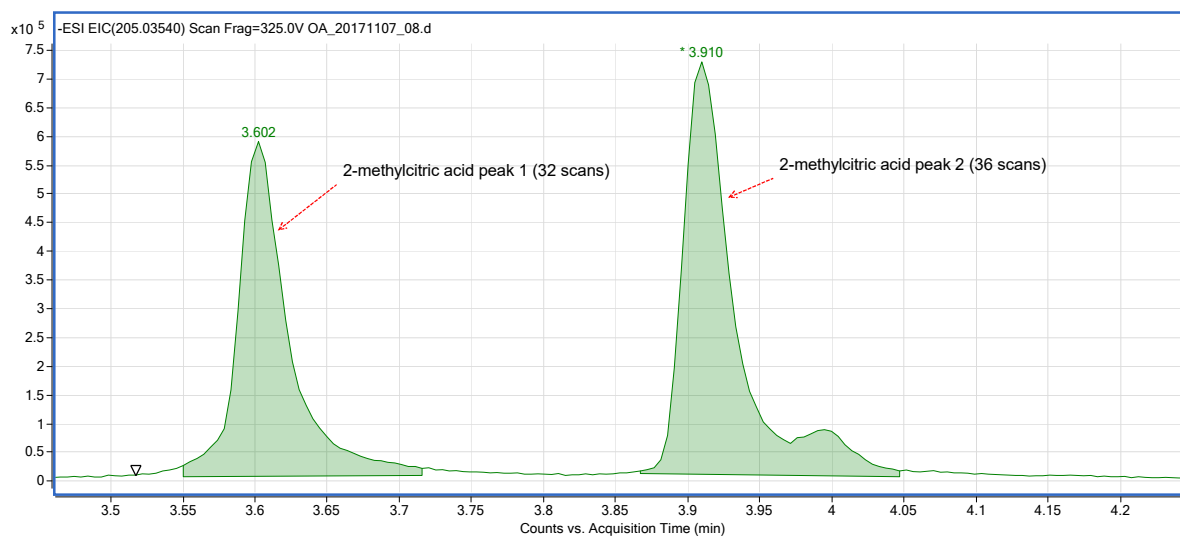

Standard 2-methylcitric acid concentration 150  $\mu\text{M}$

### C: The poor peak shape of succinylacetone

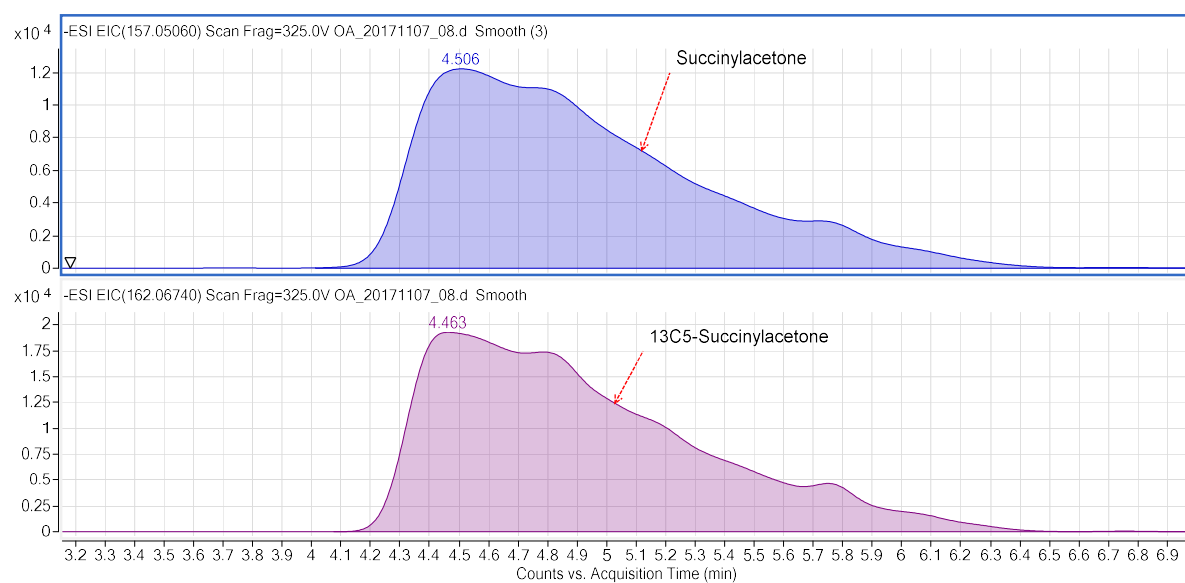

Standard Succinylacetone concentration 53  $\mu\text{M}$ ; Internal standard 13C5-Succinylacetone 75  $\mu\text{M}$
